# Supplementary material for: From the air to the water phase: implication for toxicity testing of combustion-derived particles
Source: Springer Nature journal article supplement (doi:10.1007/s13399-017-0295-1), 2017-12-11
Supplement: MOESM1 [file 15295216]

Journal: Biomass Conversion and Biorefinery

**From the air to the water phase: Implication for toxicity testing of combustion derived particles**

Authors: Susanne Schmidt, Rolf Altenburger, Dana Kühnel

Department Bioanalytical Ecotoxicology, Helmholtz Centre for Environmental Research–UFZ, Leipzig, Germany

Corresponding author: Dana Kühnel, [dana.kuehnel@ufz.de](mailto:dana.kuehnel@ufz.de), +49 341 235 1515

**Supplement Material**

**Table S1** Summary of the used bioassays within the 81 publications. The main effect detection categories “ecotoxicity”, “cytotoxicity”, “cell viability”, “mutagenicity/ genotoxicity” and “oxidative stress” with the corresponding Bioassays were listed.

|             | Assay                               | Organism                                                            | Cell line | Exposure duration | Effect                                 | Literature                       |
|-------------|-------------------------------------|---------------------------------------------------------------------|-----------|-------------------|----------------------------------------|----------------------------------|
| Ecotoxicity | Algae Growth Inhibition Assay       | <i>Selenastrum capricornutum</i>                                    | -         | 96 h              | Chlorophyll content, Growth inhibition | [67]                             |
|             | Algaltokit F™                       | <i>Selenastrum capricornutum</i>                                    | -         | 72 h              | Growth inhibition                      | [23]                             |
|             | Artoxkit M™                         | <i>Artemia franciscana</i>                                          | -         | 24 h              | Immobilisation                         | [23]                             |
|             | Bacterial Contact Test              | <i>Arthrobacter globiformis</i>                                     | -         | 2 h               | Bacterial cytotoxicity                 | [7]                              |
|             | <b>Bioluminescent Bacteria Test</b> | <i>Photobacterium phosphoreum</i> T3 (PPT3); <i>Vibrio fischeri</i> | -         | 30 min            | Bacterial cytotoxicity                 | [12, 13, 14, 23, 65, 66, 88, 91] |
|             | Daphnia Acute Immobilisation Assay  | <i>Ceriodaphnia dubia</i>                                           | -         | 48 h              | Immobilisation                         | [67]                             |
|             | Daphtoxkit Fmagna™                  | <i>Daphnia magna</i>                                                | -         | 48 h              | Immobilisation                         | [23]                             |

|              | Assay                                | Organism                          | Cell line                                                                         | Exposure duration  | Effect                 | Literature   |
|--------------|--------------------------------------|-----------------------------------|-----------------------------------------------------------------------------------|--------------------|------------------------|--------------|
| Ecotoxicity  | Marine Algaltookit                   | <i>Phaeodactylum tricornutum</i>  | -                                                                                 | 72 h               | Growth inhibition      | [23]         |
|              | Pseudomonas putida growth inhibition | <i>Pseudomonas putida</i>         | -                                                                                 | 16 h               | Bacterial cytotoxicity | [64]         |
|              | ToxAlert® 100                        | <i>Vibrio fischeri</i>            | -                                                                                 | n.d. (ISO 11348-3) | Bacterial cytotoxicity | [88]         |
|              | Zebrafish Embryo Assay               | <i>Danio rerio</i>                | -                                                                                 | 96 h               | Lethality              | [90]         |
| Cytotoxicity | Alamar blue                          | <i>Homo sapiens; Mus musculus</i> | adenocarcinoma epithelial cell line (A549), macrophage cell line (J774A.1 ;THP-1) | 24 - 48 h          | Cytotoxicity           | [28, 69, 71] |
|              | Alkaline Phosphatase Assay           | <i>Homo sapiens</i>               | adenocarcinoma epithelial cell line (A549)                                        | 16-18 h            | Cytotoxicity           | [81]         |
|              | ATP content                          | <i>Homo sapiens; Mus musculus</i> | adenocarcinoma epithelial cell line (A549), macrophage cell line (J774A.1 )       | 24 h               | Cytotoxicity           | [71, 57]     |
|              | BrdU incorporation                   | <i>Homo sapiens; Mus musculus</i> | adenocarcinoma epithelial cell line (A549), macrophage cell line (J774A.1 )       | 24 h               | Cytotoxicity           | [71]         |

|                | Assay                                             | Organism                                             | Cell line                                                                                                                                                                                                                                                         | Exposure duration | Effect         | Literature                                                                  |
|----------------|---------------------------------------------------|------------------------------------------------------|-------------------------------------------------------------------------------------------------------------------------------------------------------------------------------------------------------------------------------------------------------------------|-------------------|----------------|-----------------------------------------------------------------------------|
| Cytotoxicity   | Direct contact <i>in-vitro</i> Cytotoxicity Assay | <i>Homo sapiens; Mus musculus</i>                    | adenocarcinoma epithelial cell line (A549), macrophage cell line (RAW 264.7 ;THP-1)                                                                                                                                                                               | 48 h              | Cytotoxicity   | [55]                                                                        |
|                | LDH release                                       | <i>Cricetinae; Homo sapiens; Mus musculus</i>        | adenocarcinoma epithelial cell line (A549), bronchial epithelial cell line (BEAS-2B, 16HBE14o-), fibroblast cell line (WI-38 and CHL/IU), macrophage cell line (RAW264.7, J774, THP-1)                                                                            | 24 - 72 h         | Cytotoxicity   | [3, 11, 26, 30, 31, 36, 43, 46, 49, 50, 57, 58, 61, 68, 69, 71, 80, 81, 87] |
|                | Morphological Transformation Assay                | <i>Mus musculus</i>                                  | fibroblast cell line(BALB/c 3T3 A31-1-1)                                                                                                                                                                                                                          | 48 h              | Cytotoxicity   | [74, 84]                                                                    |
|                | Neutral Red                                       | <i>Homo sapiens; Mus musculus</i>                    | bronchial epithelial cell line (BEAS-2B), fibroblast cell line (L929)                                                                                                                                                                                             | 24 h              | Cytotoxicity   | [60, 72, 85]                                                                |
|                | Trypan blue staining                              | <i>Mus musculus</i>                                  | macrophage cell line (RAW264.7)                                                                                                                                                                                                                                   | 24 h              | Cytotoxicity   | [3, 79]                                                                     |
| Cell viability | Crystal violet                                    | <i>Homo sapiens; Mus musculus; Rattus</i>            | adenocarcinoma epithelial cell line (A549), endothelial cell line (SVEC4-10), macrophage cell line (J774A.1); fibroblast cell line (Balb-c; RLF)                                                                                                                  | 72 h              | Cell viability | [37, 70, 80]                                                                |
|                | MTT-Assay                                         | <i>Cricetinae; Homo sapien; Mus musculus; Rattus</i> | adenocarcinoma epithelial cell line (A549), bronchial epithelial cell line (MRC-5, V79), endothelial cell line (SVEC4-10), fibroblast cell line (MEF, CHL/IU), hepatoma cell line (MH1C1, FaO), kidney cell line (BHK-21), macrophage cell line (RAW264.7, THP-1) | 16 - 72 h         | Cell viability | [7, 12, 16, 20, 23, 28, 29, 35-40, 45, 48-50, 55, 56, 61, 78, 79, 87, 89]   |
|                | Resazurin reduction                               | <i>Homo sapiens; Mus musculus</i>                    | adenocarcinoma epithelial cell line (A549), lymphoma cell line (EL-4); macrophage cell line (J774A.1)                                                                                                                                                             | 24 h              | Cell viability | [58, 63]                                                                    |

|                            | Assay                                     | Organism                                                                           | Cell line                                                                                                                                                                                                                                                                          | Exposure duration | Effect         | Literature                                                                                |
|----------------------------|-------------------------------------------|------------------------------------------------------------------------------------|------------------------------------------------------------------------------------------------------------------------------------------------------------------------------------------------------------------------------------------------------------------------------------|-------------------|----------------|-------------------------------------------------------------------------------------------|
| Cell viability             | WST-1 Assay                               | <i>Homo sapiens</i>                                                                | adenocarcinoma epithelial cell line (A549), bronchial epithelial cell line (BEAS-2B)                                                                                                                                                                                               | 3 - 72 h          | Cell viability | [3, 11]                                                                                   |
|                            | WST-8 Assay                               | <i>Homo sapiens</i>                                                                | bronchial epithelial cell line (HBE)                                                                                                                                                                                                                                               | 24 h              | Cell viability | [33]                                                                                      |
| Mutagenicity/ Genotoxicity | Ames-test                                 | <i>Salmonella typhimurium</i> (TA98, TA100, TA102, TA1535, YG1024, YG1029, YG1041) | -                                                                                                                                                                                                                                                                                  | 48-66 h           | Mutagenicity   | [11, 22, 27, 54, 64, 72, 73, 77, 82]                                                      |
|                            | Chromosomal aberrations                   | <i>Cricetinae</i>                                                                  | ovary epithelial cell line (CHO-K1)                                                                                                                                                                                                                                                | 3 h               | Mutagenicity   | [73]                                                                                      |
|                            | Comet Assay                               | <i>Cricetinae, Homo sapiens, Mus musculus, Rattus</i>                              | adenocarcinoma epithelial cell line (A549), bronchial epithelial cell line (BEAS-2B, MRC-5), bronchial epithelial cell line (V79), fibroblast cell line (MEF, Balb-c), hepatoma cell line (HepG2), macrophage cell line (RAW264.7, THP-1), primary leukocytes, primary lymphocytes | 1 - 72 h          | Mutagenicity   | [3, 9, 12, 21, 22, 27, 28, 31, 32, 35, 41, 42, 45, 47, 48, 50, 54, 60, 61, 70, 75-77, 86] |
|                            | GADD45α-GFP GreenScreen® Human Cell Assay | <i>Homo sapiens</i>                                                                | GADD45α-GFP transfected lymphoma cell line (GenM-T01)                                                                                                                                                                                                                              | 48 h              | Mutagenicity   | [35]                                                                                      |
|                            | Micronucleus test                         | <i>Cricetinae, Homo sapiens, Mus musculus</i>                                      | adenocarcinoma epithelial cell line (A549), bronchial epithelial cell line (BEAS-2B, V79), macrophage cell line (RAW 264.7), ovary epithelial cell line (CHO-K1), primary leukocytes                                                                                               | 4 -72 h           | Mutagenicity   | [22, 27, 31, 45, 47, 77, 79]                                                              |
|                            | Muta-Chromplate                           | <i>Salmonella typhimurium</i> (TA100, TA98)                                        | -                                                                                                                                                                                                                                                                                  | n.d.              | Mutagenicity   | [89]                                                                                      |

|                            | Assay                       | Organism                                               | Cell line                                                                                                                                                                                       | Exposure duration | Effect           | Literature                                  |
|----------------------------|-----------------------------|--------------------------------------------------------|-------------------------------------------------------------------------------------------------------------------------------------------------------------------------------------------------|-------------------|------------------|---------------------------------------------|
| Mutagenicity/ Genotoxicity | SOS-Chromotest              | <i>Escherichia coli</i>                                | -                                                                                                                                                                                               | n.d.              | Mutagenicity     | [91]                                        |
|                            | umuC Assay                  | <i>Salmonella typhimurium</i> (TA1535/pSK1002, NM3009) | -                                                                                                                                                                                               | 2 h               | Mutagenicity     | [7, 10]                                     |
|                            | Vitotox Assay               | <i>Salmonella typhimurium</i> (TA104 recN2-4)          | -                                                                                                                                                                                               | n.d.              | Mutagenicity     | [27]                                        |
| oxidative stress           | <b>DCFH-DA Assay</b>        | <i>Homo sapiens, Mus musculus, Rattus</i>              | adenocarcinoma epithelial cell line (A549), bronchial epithelial cell line (16HBE14o-), fibroblast cell line (MEF), hepatoma cell line (HepG2), macrophage cell line (NR8383, RAW 264.7, THP-1) | 1- 24 h           | Oxidative stress | [3, 26, 31, 35, 36, 43, 52, 53, 69, 75, 83] |
|                            | Fpg-modified Comet Assay    | <i>Homo sapiens</i>                                    | adenocarcinoma epithelial cell line (A549)                                                                                                                                                      | 24h               | Oxidative stress | [50]                                        |
|                            | Superoxide anion generation | <i>Homo sapiens</i>                                    | adenocarcinoma epithelial cell line (A549)                                                                                                                                                      | 1 h               | Oxidative stress | [78]                                        |
